# Supplementary material for: Effect of nanovaccine chemistry on humoral immune response kinetics and maturation
Source: Royal Society of Chemistry journal article supplement (doi:10.1039/c4nr03724c), 2014-01-01
Supplement: c4nr03724c1.pdf [file c4nr03724c1.pdf]

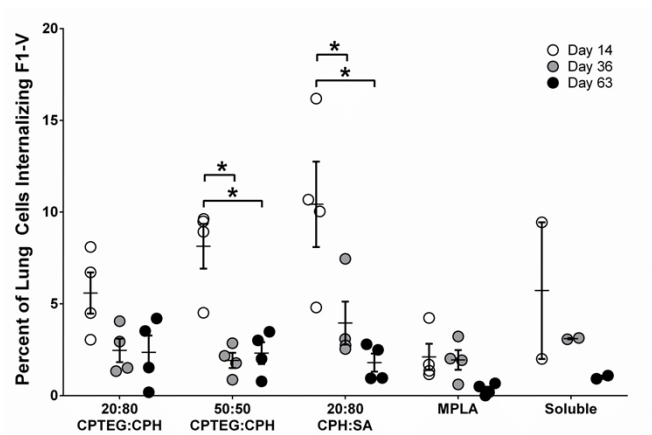

**Fig S1.** Persistence of particles leads to sustained internalization of antigen. Multispectral imaging flow cytometry was used to determine the internalization of F1-V by lung cells. Error bars represent the standard error of the mean with  $n = 8$  from two independent experiments (day 36) and  $n = 4$  from one experiment (days 14 and 63). One thousand events per sample were acquired and analyzed as described. Asterisks represent statistical differences between time points within a single formulation ( $p \leq 0.0082$ ).
